# Supplementary material
Source: PubMed Central journal article supplement (PMC10027868)
Supplement: 41467_2023_37035_MOESM1_ESM.pdf [file 41467_2023_37035_MOESM1_ESM.pdf]

## Supplementary Material Information

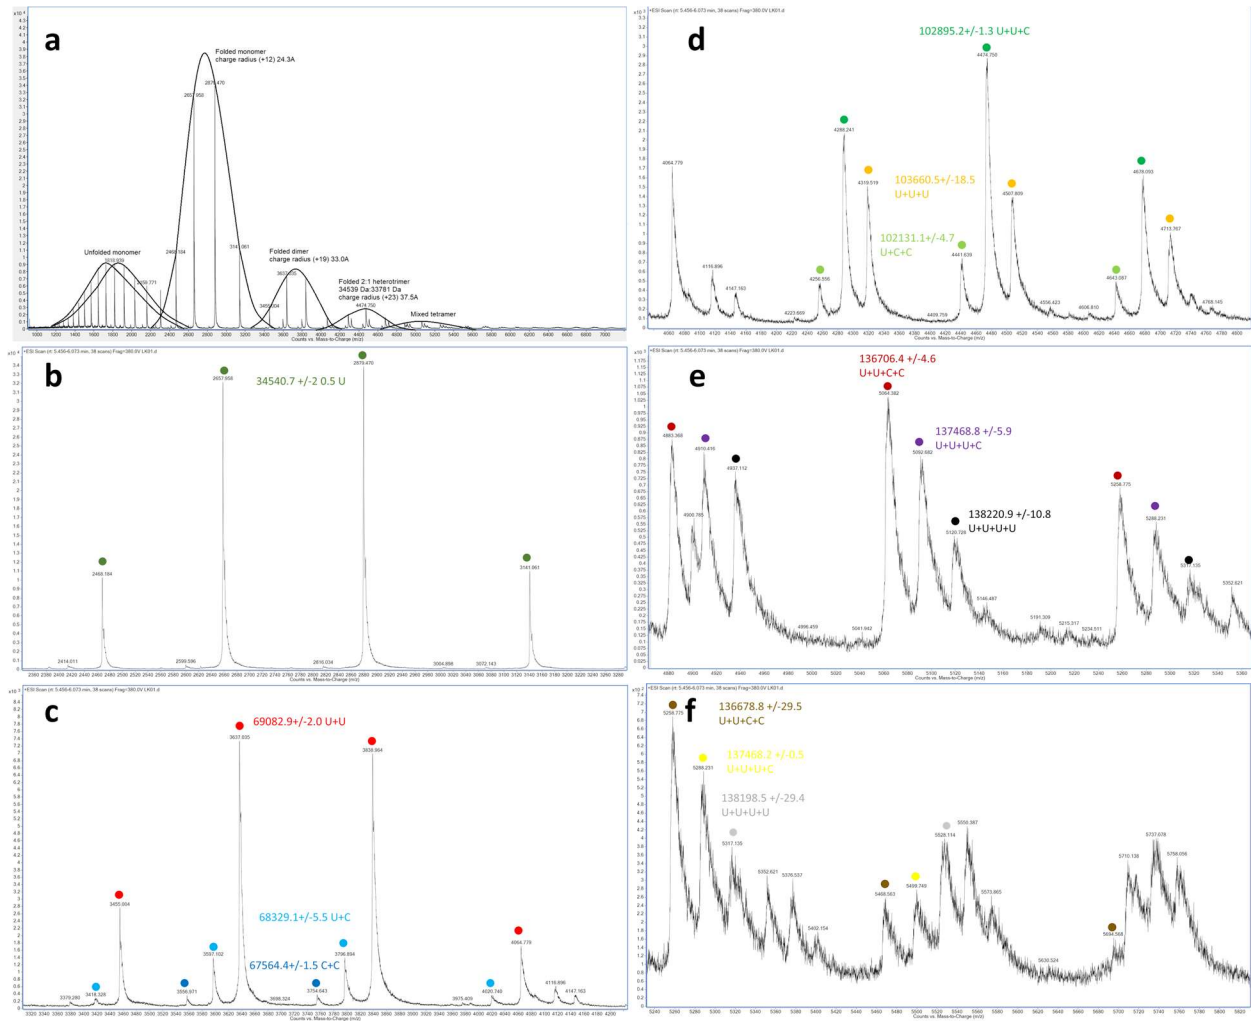

Supplementary Figure 1. Native mass spectrometry of SARS-CoV-2 M<sup>pro</sup> C145S data analysis. a. Complete profile from the sample 2, showing distinct oligomeric states. b. Analysis of primary peak containing folded monomers. c. Analysis of peaks containing folded dimers, showing that oligomers can be formed by all combinatory possibilities uncleaved (U) and cleaved (C) particles. d. Analysis of peaks containing folded trimers, showing that oligomers can be formed by all combinatory possibilities U and particles. e and f Analysis of peaks containing folded tetramers, showing that oligomers can be formed by all combinatory possibilities U and C particles.

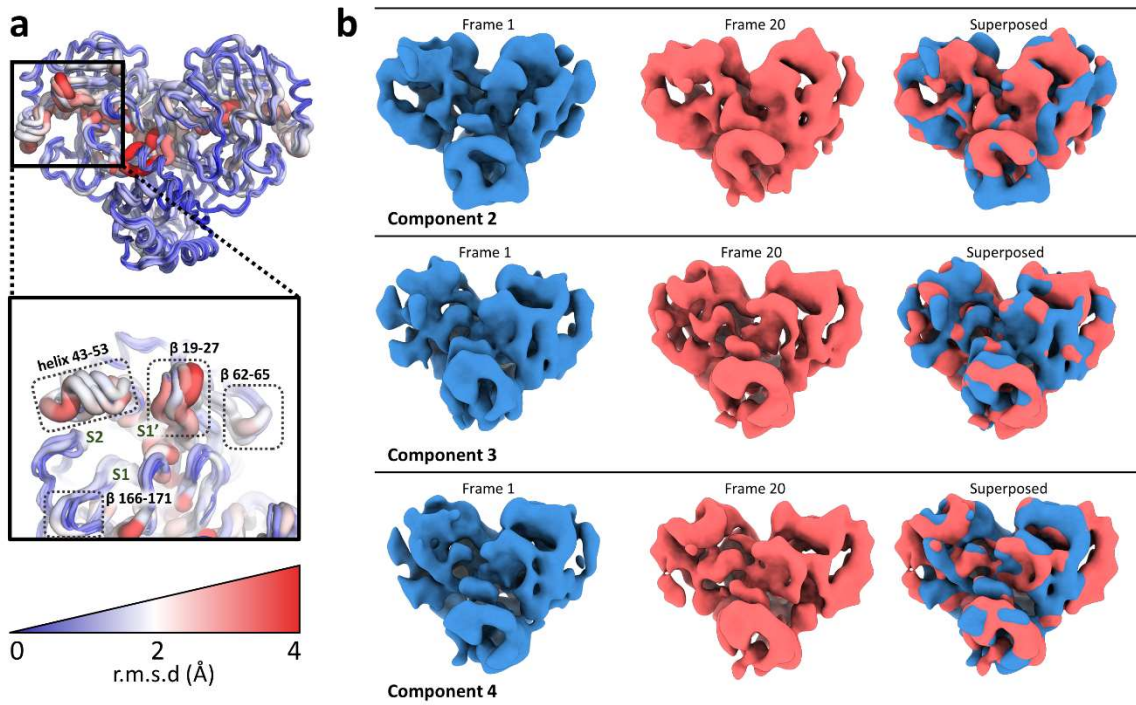

Supplementary Figure 2. 3DVA of SARS-CoV-2 M<sup>pro</sup> C145S. a. Aligned models of M<sup>pro</sup> that were morphed in distinct frames of 3DVA models, colored according to its r.m.s.d. The square box is highlighting the active site loops where we observed the largest r.m.s.d values. b. 3DVA maps of components 2, 3 and 4 showing first (blue), last (red) and superposed maps.

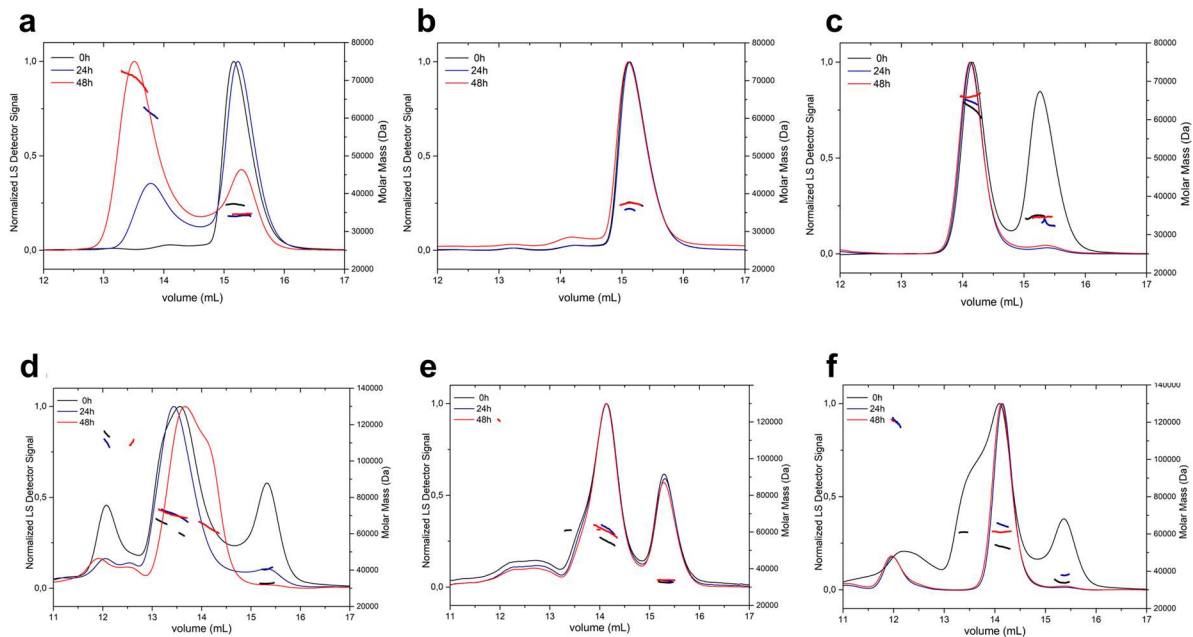

Supplementary Figure 3. SEC elution profiles of monomeric peak of C145S M<sup>PRO</sup>. a. SEC-MALS elution profiles of C145S M<sup>PRO</sup> monomers after 0h (black), 24h (blue) and 48h (red) incubation. b. SEC-MALS elution profiles of C145S M<sup>PRO</sup> monomers in presence of MAT-POS-e194df51-1 after 0h (black), 24h (blue) and 48h (red) incubation. c. SEC-MALS elution profiles of C145S M<sup>PRO</sup> monomers in presence of Nirmatrelvir after 0h (black), 24h (blue) and 48h (red) incubation. d. SEC-MALS elution profiles of C145S M<sup>PRO</sup> tetramers after 0h (black), 24h (blue) and 48h (red) incubation. e. SEC-MALS elution profiles of C145S M<sup>PRO</sup> tetramers in presence of MAT-POS-e194df51-1 after 0h (black), 24h (blue) and 48h (red) incubation. f. SEC-MALS elution profiles of C145S M<sup>PRO</sup> tetramers in presence of Nirmatrelvir after 0h (black), 24h (blue) and 48h (red) incubation. In SEC-MALS graphs, curves correspond to the change in the normalized scattered light intensity at 90° (lines) and calculated molar mass of the corresponding peak (dots) are given for each peak. Due to the limits of resolution, trimers and tetramers were treated as tetramers. Graphs were plotted from individual SEC-MALS experiments (n=1), compared with multiple concentration controls.

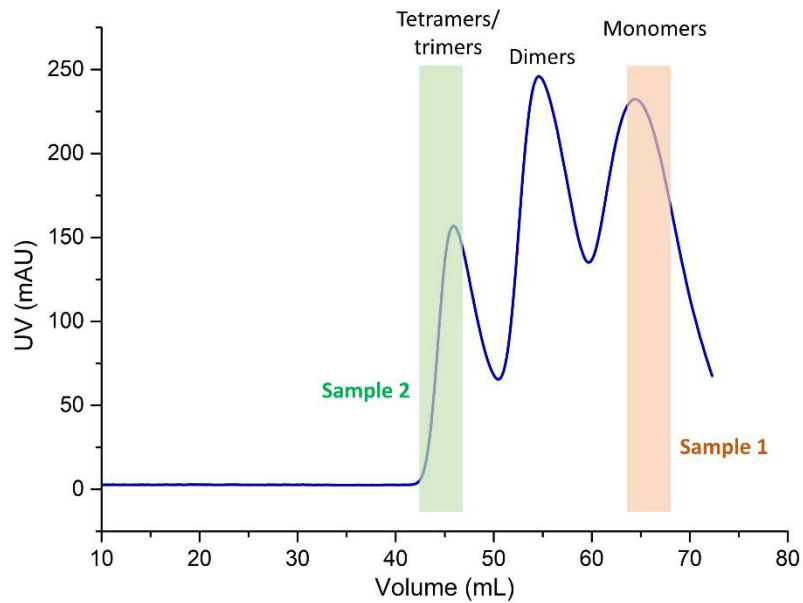

Supplementary Figure 4. Final size exclusion chromatography from SARS-CoV-2 M<sup>pro</sup> C145S purification. Graph shows overlapping peaks of multiple oligomeric states. Colored areas demark fractions used for composing sample 1 (orange area) and sample 2 (green area). SDS-page shows sample 1 (left) and sample 2 (right), with molecular marker. Graphs were plotted of individual a size exclusion chromatography from SARS-CoV-2 experiment exemplary. Original SDS-page is available in Source data.

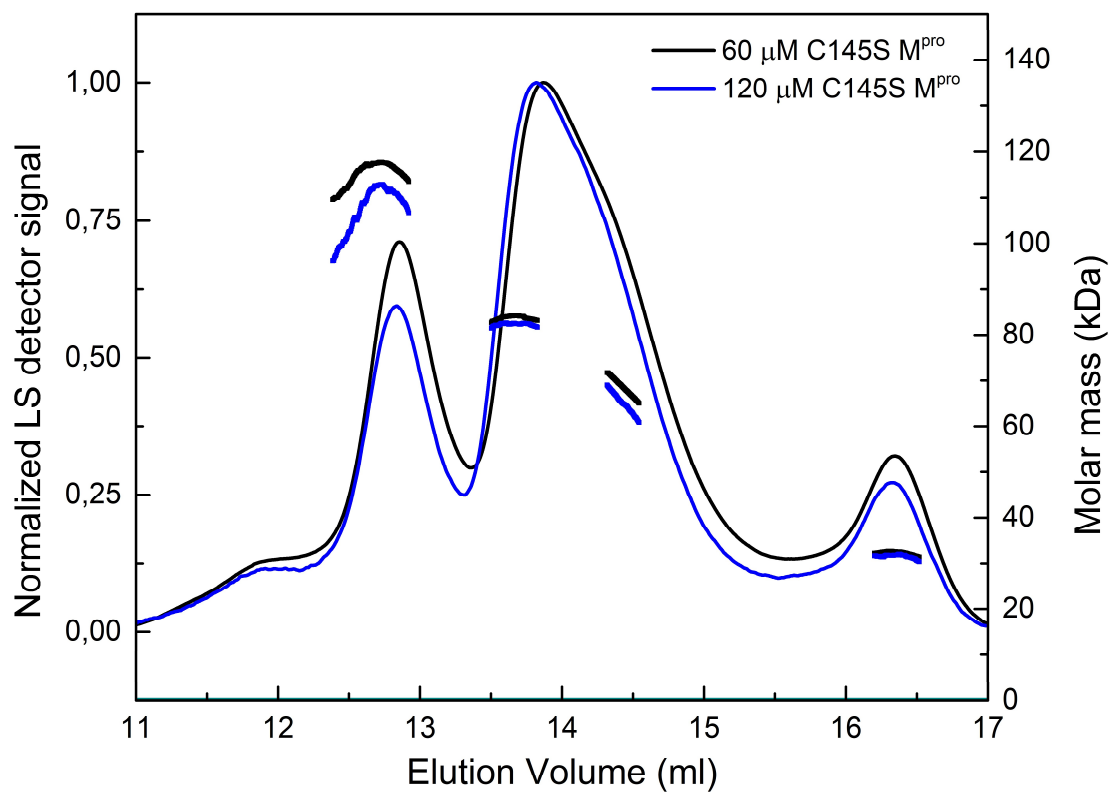

Supplementary Figure 5. SEC-MALS calibration showing two injections concentration of sample 2. In black, we see the injection of sample 2 at 60  $\mu\text{M}$ , while in blue we see the injection of sample 2 at 120  $\mu\text{M}$ . Graphs were plotted from individual SEC-MALS experiments in two concentrations.

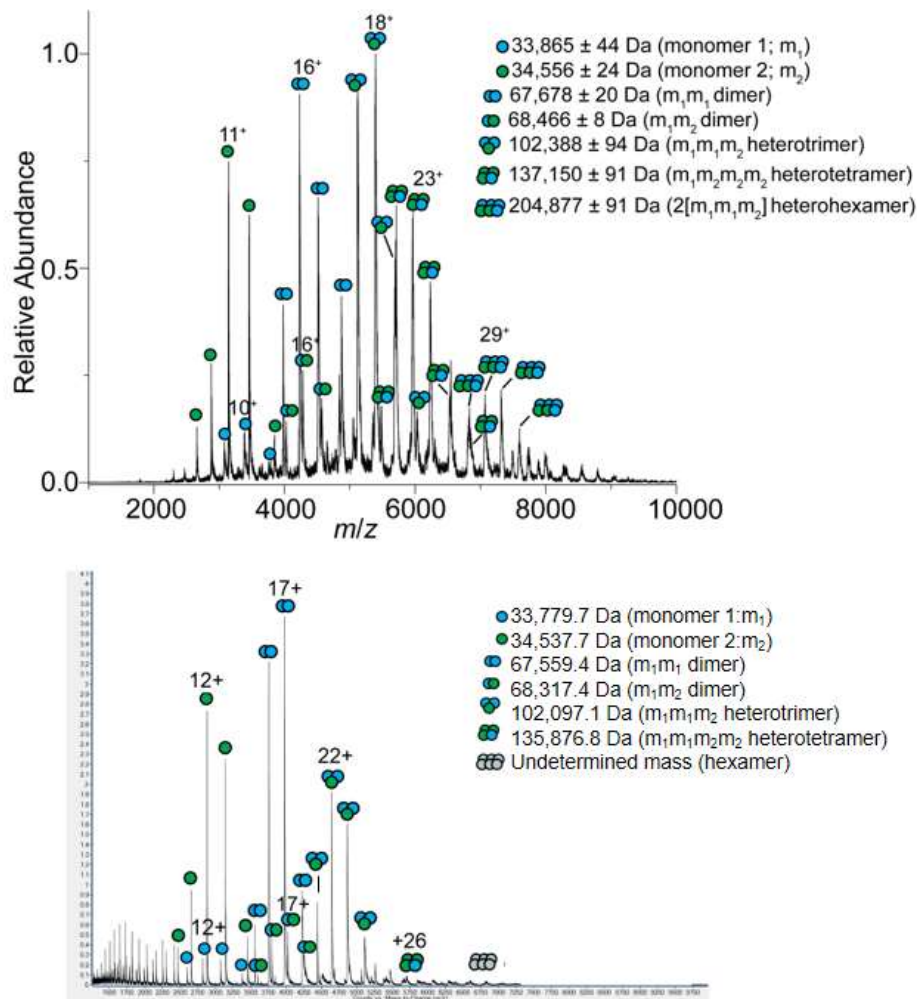

Supplementary Figure 6. Native mass spectrometry analysis of M<sup>Pro</sup> C145S tetrameric sample in two different instruments. At the top, native mass spectrometry using Orbitrap Q-Exactive UHMR instrument. At bottom, the data from main Figure 1, collected in the Agilent 1100 HPLC system, and plotted in the same style for comparison. Monomer peaks corresponding to the light and heavy forms of M<sup>Pro</sup> are labelled with blue and green circles, respectively. Molecular weights are green - 33,865 ± 44 Da; blue - 34,556 ± 24 Da. Homo- and hetero-oligomer peaks are labelled according to this color scheme, with the number of each colored circle corresponding to the oligomer assignment. Graphs were plotted from individual Native mass spectrometry experiments.

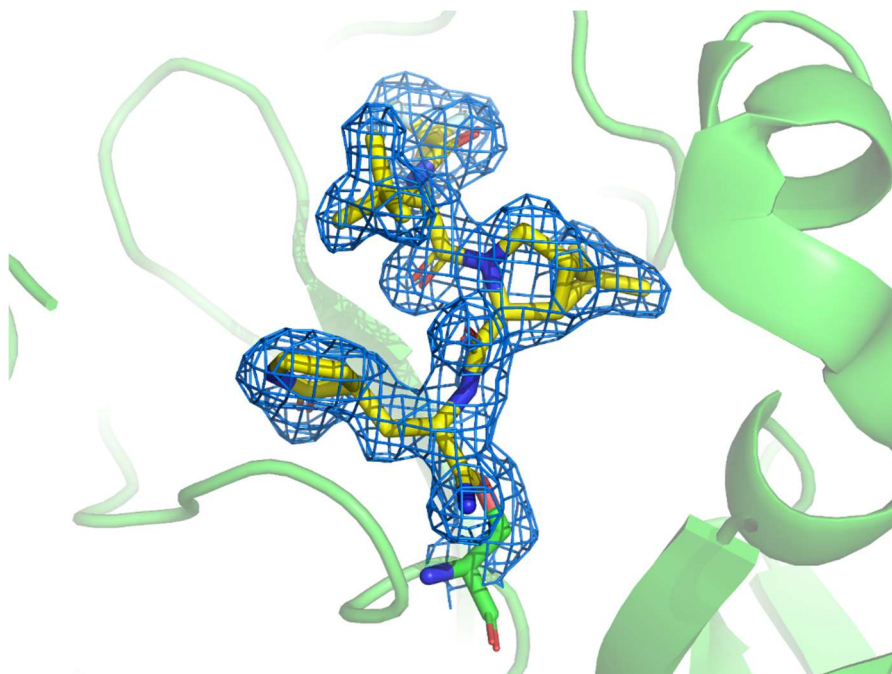

Supplementary Figure 7. C145S bound to Nirmatrelvir. Figure show electron-density from Nirmatrelvir bound to C145S M<sup>pro</sup>. Electron density is represented as blue mesh and was calculated from 2Fo-Fc map with 1.0  $\sigma$ . Nirmatrelvir (yellow) and S145 residue are show as sticks and M<sup>pro</sup> as green cartoon. Maps and models are available in PDB under code 8EYJ.



## Consortia Members and Affiliations

### COVID Moonshot Consortium

| <b>NAME</b>                | <b>INSTITUTION(S)</b>             | <b>DEPARTMENT</b>                                                                                                 | <b>ADDRESS</b>                                                          | <b>EMAIL</b>                  |
|----------------------------|-----------------------------------|-------------------------------------------------------------------------------------------------------------------|-------------------------------------------------------------------------|-------------------------------|
| <b>MATTHEW C. ROBINSON</b> | PostEra Inc.                      | Technology                                                                                                        | 2 Embarcadero Center, 8th Floor, San Francisco, CA 94111, United States | matthew.robinson@postera.ai   |
| <b>NIR LONDON</b>          | The Weizmann Institute of Science | Chemical and Structural Biology                                                                                   | Hertzl 234 st. Rehovot, Israel, 7610001                                 | nir.london@weizmann.ac.il     |
| <b>EFRAT RESNICK</b>       | The Weizmann Institute of Science | Chemical and Structural Biology                                                                                   | Hertzl 234 st. Rehovot, Israel, 7610001                                 | efrat.resnick@weizmann.ac.il  |
| <b>DANIEL ZAIDMANN</b>     | The Weizmann Institute of Science | Chemical and Structural Biology                                                                                   | Hertzl 234 st. Rehovot, Israel, 7610001                                 | daniel.zaidman@weizmann.ac.il |
| <b>PAUL GEHRTZ</b>         | The Weizmann Institute of Science | Chemical and Structural Biology                                                                                   | Hertzl 234 st. Rehovot, Israel, 7610001                                 | paul.gehrtz@weizmann.ac.il    |
| <b>RAMBABU N. REDDI</b>    | The Weizmann Institute of Science | Chemical and Structural Biology                                                                                   | Hertzl 234 st. Rehovot, Israel, 7610001                                 | rambabu.reddi@weizmann.ac.il  |
| <b>RONEN GABIZON</b>       | The Weizmann Institute of Science | Chemical and Structural Biology                                                                                   | Hertzl 234 st. Rehovot, Israel, 7610001                                 | ronen.gabizon@weizmann.ac.il  |
| <b>HAIM BARR</b>           | The Weizmann Institute of Science | Wohl Institute for Drug Discovery of the Nancy and Stephen Grand Israel National Center for Personalized Medicine | Hertzl 234 st. Rehovot, Israel, 7610001                                 | haim.barr@weizmann.ac.il      |
| <b>SHIRLY DUBERSTEIN</b>   | The Weizmann Institute of Science | Wohl Institute for Drug Discovery of the Nancy and Stephen Grand Israel National Center for Personalized Medicine | Hertzl 234 st. Rehovot, Israel, 7610001                                 | shirly.valter@weizmann.ac.il  |
| <b>HADEER ZIDANE</b>       | The Weizmann Institute of Science | Wohl Institute for Drug Discovery of the Nancy and Stephen Grand Israel National Center for Personalized Medicine | Hertzl 234 st. Rehovot, Israel, 7610001                                 | hadeer.zidane@weizmann.ac.il  |

|                             |                                       |                                                                                                                   |                                                                         |                                  |
|-----------------------------|---------------------------------------|-------------------------------------------------------------------------------------------------------------------|-------------------------------------------------------------------------|----------------------------------|
| <b>KHRIESTO SHURRUSH</b>    | The Weizmann Institute of Science     | Wohl Institute for Drug Discovery of the Nancy and Stephen Grand Israel National Center for Personalized Medicine | Hertzl 234 st. Rehovot, Israel, 7610001                                 | khriesto.shurrush@weizmann.ac.il |
| <b>GALIT COHEN</b>          | The Weizmann Institute of Science     | Wohl Institute for Drug Discovery of the Nancy and Stephen Grand Israel National Center for Personalized Medicine | Hertzl 234 st. Rehovot, Israel, 7610001                                 | galit.cohen@weizmann.ac.il       |
| <b>LEONARDO J. SOLMESKY</b> | The Weizmann Institute of Science     | Wohl Institute for Drug Discovery of the Nancy and Stephen Grand Israel National Center for Personalized Medicine | Hertzl 234 st. Rehovot, Israel, 7610001                                 | leonardo.solmesky@weizmann.ac.il |
| <b>ALPHA LEE</b>            | PostEra Inc.; University of Cambridge |                                                                                                                   |                                                                         | alpha.lee@postera.ai             |
| <b>ANDREW JAJACK</b>        | PostEra Inc.                          | Technology                                                                                                        | 2 Embarcadero Center, 8th Floor, San Francisco, CA 94111, United States | ajajack@gmail.com                |
| <b>MILAN CVITKOVIC</b>      | PostEra Inc.                          | Technology                                                                                                        | 2 Embarcadero Center, 8th Floor, San Francisco, CA 94111, United States | milan.cvitkovic@postera.ai       |
| <b>JIN PAN</b>              | PostEra Inc.                          | Technology                                                                                                        | 2 Embarcadero Center, 8th Floor, San Francisco, CA 94111, United States | jin.pan@postera.ai               |
| <b>RUBY PAI</b>             | PostEra Inc.                          | Technology                                                                                                        | 2 Embarcadero Center, 8th Floor, San Francisco, CA 94111, United States | ruby.pai@postera.ai              |
| <b>EMILY GRACE RIPKA</b>    | PostEra Inc.                          | Technology                                                                                                        | 2 Embarcadero Center, 8th Floor, San Francisco, CA 94111, United States | emily.ripka@postera.ai           |
| <b>LUONG NGUYEN</b>         | PostEra Inc.                          | Technology                                                                                                        | 2 Embarcadero Center, 8th Floor,                                        | luong.nguyen@postera.ai          |

|                                   |                                                       |                        |                                                                                                                                        |                                                                                       |
|-----------------------------------|-------------------------------------------------------|------------------------|----------------------------------------------------------------------------------------------------------------------------------------|---------------------------------------------------------------------------------------|
|                                   |                                                       |                        | San Francisco,<br>CA 94111, United<br>States                                                                                           |                                                                                       |
| <b>MIKHAIL<br/>SHAFEEV</b>        | Enamine Ltd                                           | Synthetic<br>Chemistry | 78<br>Chervonotkatska<br>Street, 02094<br>Kyiv, Ukraine                                                                                | m.shafeev@mail.<br>enamine.net                                                        |
| <b>TATIANA<br/>MATVIIUK</b>       | Enamine Ltd                                           | Synthetic<br>Chemistry | 78<br>Chervonotkatska<br>Street, 02094<br>Kyiv, Ukraine                                                                                | t.matviyuk@enami<br>ne.net                                                            |
| <b>OLEG MICHURIN</b>              | Enamine Ltd                                           | Synthetic<br>Chemistry | 78<br>Chervonotkatska<br>Street, 02094<br>Kyiv, Ukraine                                                                                | o.michurin@enam<br>ine.net                                                            |
| <b>EUGENE<br/>CHERNYSHENKO</b>    | Enamine Ltd                                           | Synthetic<br>Chemistry | 78<br>Chervonotkatska<br>Street, 02094<br>Kyiv, Ukraine                                                                                | e.chernyshenko@<br>mail.enamine.net                                                   |
| <b>VITALIY A.<br/>BILENKO</b>     | Enamine Ltd                                           | Synthetic<br>Chemistry | 78<br>Chervonotkatska<br>Street, 02094<br>Kyiv, Ukraine                                                                                | <a href="mailto:v.bilenko@mail.enamine.net">v.bilenko@mail.en<br/>amine.net</a>       |
| <b>SERHII O.<br/>KINAKH</b>       | Enamine Ltd                                           | Synthetic<br>Chemistry | 78<br>Chervonotkatska<br>Street, 02094<br>Kyiv, Ukraine                                                                                | <a href="mailto:s.kinakh@mail.enamine.net">s.kinakh@mail.en<br/>amine.net</a>         |
| <b>IVAN G.<br/>LOGVINENKO</b>     | Enamine Ltd                                           | Synthetic<br>Chemistry | 78<br>Chervonotkatska<br>Street, 02094<br>Kyiv, Ukraine                                                                                | <a href="mailto:i.logvinenko@mail.enamine.net">i.logvinenko@mail<br/>.enamine.net</a> |
| <b>KOSTIANTYN P.<br/>MELNYKOV</b> | Enamine Ltd                                           | Synthetic<br>Chemistry | 78<br>Chervonotkatska<br>Street, 02094<br>Kyiv, Ukraine                                                                                | <a href="mailto:k.melnykov@mail.enamine.net">k.melnykov@mail.<br/>enamine.net</a>     |
| <b>VICTOR D.<br/>HULIAK</b>       | Enamine Ltd                                           | Synthetic<br>Chemistry | 78<br>Chervonotkatska<br>Street, 02094<br>Kyiv, Ukraine                                                                                | <a href="mailto:v.huliak@mail.enamine.net">v.huliak@mail.ena<br/>mine.net</a>         |
| <b>IGOR S.<br/>TSURUPA</b>        | Enamine Ltd                                           | Synthetic<br>Chemistry | 78<br>Chervonotkatska<br>Street, 02094<br>Kyiv, Ukraine                                                                                | <a href="mailto:i.tsurupa@mail.enamine.net">i.tsurupa@mail.en<br/>amine.net</a>       |
| <b>MARIAN<br/>GORICHKO</b>        | Taras<br>Shevchenko<br>National<br>University of Kyiv | Organic Chemistry      | Volodymyrska str.<br>64, 01033 Kyiv,<br>Ukraine                                                                                        | 417lab@gmail.co<br>m                                                                  |
| <b>AARIF SHAIKH</b>               | Sai Life Sciences                                     | Synthetic<br>Chemistry | Sai Life Sciences<br>Limited, DS-7,<br>ICICI Knowledge<br>Park,<br>Shameerpet,<br>Hyderabad 500<br>078, Telangana,<br>India, Phone No: | aarif.s@sailife.co<br>m                                                               |

|                         |                                                       |                     |                                                                                                                                                                           |                             |
|-------------------------|-------------------------------------------------------|---------------------|---------------------------------------------------------------------------------------------------------------------------------------------------------------------------|-----------------------------|
|                         |                                                       |                     | +91 40<br>8418662201                                                                                                                                                      |                             |
| <b>JAKIR PINJARI</b>    | Sai Life Sciences                                     | Synthetic Chemistry | Sai Life Sciences Limited, DS-7, ICICI Knowledge Park, Shameerpet, Hyderabad 500 078, Telangana, India, Phone No: +91 40 8418662201                                       | jakir.p@sailife.com         |
| <b>VISHWANATH SWAMY</b> | Sai Life Sciences                                     | Synthetic Chemistry | Sai Life Sciences Limited, DS-7, ICICI Knowledge Park, Shameerpet, Hyderabad 500 078, Telangana, India, Phone No: +91 40 8418662201                                       | vishwanath.s@sailife.com    |
| <b>MANEESH PINGLE</b>   | Sai Life Sciences                                     | Synthetic Chemistry | Sai Life Sciences Limited, DS-7, ICICI Knowledge Park, Shameerpet, Hyderabad 500 078, Telangana, India, Phone No: +91 40 8418662201                                       | maneesh.p@sailife.com       |
| <b>SARMA BVNBS</b>      | Sai Life Sciences                                     | Synthetic Chemistry | Sai Life Sciences Limited, DS-7, ICICI Knowledge Park, Shameerpet, Hyderabad 500 078, Telangana, India, Phone No: +91 40 8418662201                                       | sarma.b@sailife.com         |
| <b>ANTHONY AIMON</b>    | Diamond Light Source Ltd; Research Complex at Harwell | Life Sciences       | Diamond Light Source, Harwell Science and Innovation Campus, Didcot, OX11 0DE, United Kingdom; Research Complex at Harwell, Harwell Science and Innovation Campus, Didcot | anthony.aimon@diamond.ac.uk |

|                        |                                                                                                               |               |                                                                                                                                                                                                                                                                                                                                                                                                                               |                               |
|------------------------|---------------------------------------------------------------------------------------------------------------|---------------|-------------------------------------------------------------------------------------------------------------------------------------------------------------------------------------------------------------------------------------------------------------------------------------------------------------------------------------------------------------------------------------------------------------------------------|-------------------------------|
|                        |                                                                                                               |               | OX11 0FA,<br>United Kingdom                                                                                                                                                                                                                                                                                                                                                                                                   |                               |
| <b>FRANK VON DELFT</b> | Diamond Light Source Ltd;<br>University of Oxford; Research Complex at Harwell;<br>University of Johannesburg | Life Sciences | Diamond Light Source, Harwell Science and Innovation Campus, Didcot, OX11 0DE, United Kingdom;<br>Centre for Medicine Discovery, Nuffield Department of Medicine, University of Oxford, Oxford, OX3 7DQ, United Kingdom;<br>Research Complex at Harwell, Harwell Science and Innovation Campus, Didcot OX11 0FA, United Kingdom;<br>Department of Biochemistry, University of Johannesburg, Auckland Park, 2006, South Africa | frank.von-delft@diamond.ac.uk |
| <b>DAREN FEARON</b>    | Diamond Light Source Ltd;<br>Research Complex at Harwell                                                      | Life Sciences | Diamond Light Source, Harwell Science and Innovation Campus, Didcot, OX11 0DE, United Kingdom;<br>Research Complex at Harwell, Harwell Science and Innovation Campus, Didcot OX11 0FA, United Kingdom                                                                                                                                                                                                                         | daren.fearon@diamond.ac.uk    |
| <b>LOUISE DUNNETT</b>  | Diamond Light Source Ltd;<br>Research Complex at Harwell                                                      | Life Sciences | Diamond Light Source, Harwell Science and Innovation Campus, Didcot, OX11 0DE, United Kingdom                                                                                                                                                                                                                                                                                                                                 | louise.dunnett@diamond.ac.uk  |

|                              |                                                                   |               |                                                                                                                                                                                                                                              |                                     |
|------------------------------|-------------------------------------------------------------------|---------------|----------------------------------------------------------------------------------------------------------------------------------------------------------------------------------------------------------------------------------------------|-------------------------------------|
|                              |                                                                   |               | Kingdom;<br>Research<br>Complex at<br>Harwell, Harwell<br>Science and<br>Innovation<br>Campus, Didcot<br>OX11 0FA, United<br>Kingdom                                                                                                         |                                     |
| <b>ALICE<br/>DOUANGAMATH</b> | Diamond Light<br>Source Ltd;<br>Research<br>Complex at<br>Harwell | Life Sciences | Diamond Light<br>Source, Harwell<br>Science and<br>Innovation<br>Campus, Didcot,<br>OX11 0DE, United<br>Kingdom;<br>Research<br>Complex at<br>Harwell, Harwell<br>Science and<br>Innovation<br>Campus, Didcot<br>OX11 0FA, United<br>Kingdom | alice.douangamat<br>h@diamond.ac.uk |
| <b>ALEX DIAS</b>             | Diamond Light<br>Source Ltd;<br>Research<br>Complex at<br>Harwell | CEO           | Diamond Light<br>Source, Harwell<br>Science and<br>Innovation<br>Campus, Didcot,<br>OX11 0DE, United<br>Kingdom;<br>Research<br>Complex at<br>Harwell, Harwell<br>Science and<br>Innovation<br>Campus, Didcot<br>OX11 0FA, United<br>Kingdom | alex.dias@diamon<br>d.ac.uk         |
| <b>AILSA POWELL</b>          | Diamond Light<br>Source Ltd;<br>Research<br>Complex at<br>Harwell | CEO           | Diamond Light<br>Source, Harwell<br>Science and<br>Innovation<br>Campus, Didcot,<br>OX11 0DE, United<br>Kingdom;<br>Research<br>Complex at<br>Harwell, Harwell<br>Science and<br>Innovation<br>Campus, Didcot<br>OX11 0FA, United<br>Kingdom | ailsa.powell@dia<br>mond.ac.uk      |

|                          |                                                          |               |                                                                                                                                                                                                       |                                 |
|--------------------------|----------------------------------------------------------|---------------|-------------------------------------------------------------------------------------------------------------------------------------------------------------------------------------------------------|---------------------------------|
| <b>JOSE BRANDAO NETO</b> | Diamond Light Source Ltd;<br>Research Complex at Harwell | Life Sciences | Diamond Light Source, Harwell Science and Innovation Campus, Didcot, OX11 0DE, United Kingdom;<br>Research Complex at Harwell, Harwell Science and Innovation Campus, Didcot OX11 0FA, United Kingdom | jose.brandao-neto@diamond.ac.uk |
| <b>RACHAEL SKYNER</b>    | Diamond Light Source Ltd;<br>Research Complex at Harwell | Life Sciences | Diamond Light Source, Harwell Science and Innovation Campus, Didcot, OX11 0DE, United Kingdom;<br>Research Complex at Harwell, Harwell Science and Innovation Campus, Didcot OX11 0FA, United Kingdom | rachael.skyner@diamond.ac.uk    |
| <b>WARREN THOMPSON</b>   | Diamond Light Source Ltd;<br>Research Complex at Harwell | Life Sciences | Diamond Light Source, Harwell Science and Innovation Campus, Didcot, OX11 0DE, United Kingdom;<br>Research Complex at Harwell, Harwell Science and Innovation Campus, Didcot OX11 0FA, United Kingdom | warren.thompson@diamond.ac.uk   |
| <b>TYLER GORRIESTONE</b> | Diamond Light Source Ltd;<br>Research Complex at Harwell | Life Sciences | Diamond Light Source, Harwell Science and Innovation Campus, Didcot, OX11 0DE, United Kingdom;<br>Research Complex at Harwell, Harwell Science and                                                    | tyler.gorriestone@diamond.ac.uk |

|                                    |                                                                   |               |                                                                                                                                                                                                                                              |                                              |
|------------------------------------|-------------------------------------------------------------------|---------------|----------------------------------------------------------------------------------------------------------------------------------------------------------------------------------------------------------------------------------------------|----------------------------------------------|
|                                    |                                                                   |               | Innovation<br>Campus, Didcot<br>OX11 0FA, United<br>Kingdom                                                                                                                                                                                  |                                              |
| <b>MARTIN WALSH</b>                | Diamond Light<br>Source Ltd;<br>Research<br>Complex at<br>Harwell | Life Sciences | Diamond Light<br>Source, Harwell<br>Science and<br>Innovation<br>Campus, Didcot,<br>OX11 0DE, United<br>Kingdom;<br>Research<br>Complex at<br>Harwell, Harwell<br>Science and<br>Innovation<br>Campus, Didcot<br>OX11 0FA, United<br>Kingdom | martin.walsh@dia<br>mond.ac.uk               |
| <b>DAVID OWEN</b>                  | Diamond Light<br>Source Ltd;<br>Research<br>Complex at<br>Harwell | Life Sciences | Diamond Light<br>Source, Harwell<br>Science and<br>Innovation<br>Campus, Didcot,<br>OX11 0DE, United<br>Kingdom;<br>Research<br>Complex at<br>Harwell, Harwell<br>Science and<br>Innovation<br>Campus, Didcot<br>OX11 0FA, United<br>Kingdom | david.owen@diam<br>ond.ac.uk                 |
| <b>PETRA LUKACIK</b>               | Diamond Light<br>Source Ltd;<br>Research<br>Complex at<br>Harwell | Life Sciences | Diamond Light<br>Source, Harwell<br>Science and<br>Innovation<br>Campus, Didcot,<br>OX11 0DE, United<br>Kingdom;<br>Research<br>Complex at<br>Harwell, Harwell<br>Science and<br>Innovation<br>Campus, Didcot<br>OX11 0FA, United<br>Kingdom | petra.lukacik@dia<br>mond.ac.uk              |
| <b>CLAIRE STRAIN-<br/>DAMERELL</b> | Diamond Light<br>Source Ltd;<br>Research<br>Complex at<br>Harwell | Life Sciences | Diamond Light<br>Source, Harwell<br>Science and<br>Innovation<br>Campus, Didcot,<br>OX11 0DE, United<br>Kingdom;                                                                                                                             | claire.strain-<br>damerell@diamon<br>d.ac.uk |



|                         |                                                       |                                 |                                                                                                                                                                                                    |                                |
|-------------------------|-------------------------------------------------------|---------------------------------|----------------------------------------------------------------------------------------------------------------------------------------------------------------------------------------------------|--------------------------------|
|                         |                                                       |                                 | Research Complex at Harwell, Harwell Science and Innovation Campus, Didcot OX11 0FA, United Kingdom                                                                                                |                                |
| <b>HALINA MIKOLAJEK</b> | Diamond Light Source Ltd; Research Complex at Harwell | Life Sciences                   | Diamond Light Source, Harwell Science and Innovation Campus, Didcot, OX11 0DE, United Kingdom; Research Complex at Harwell, Harwell Science and Innovation Campus, Didcot OX11 0FA, United Kingdom | halina.mikolajek@diamond.ac.uk |
| <b>SAM HORRELL</b>      | Diamond Light Source Ltd; Research Complex at Harwell | Life Sciences                   | Diamond Light Source, Harwell Science and Innovation Campus, Didcot, OX11 0DE, United Kingdom; Research Complex at Harwell, Harwell Science and Innovation Campus, Didcot OX11 0FA, United Kingdom | sam.horrell@diamond.ac.uk      |
| <b>LIZBÉ KOEKEMOER</b>  | University of Oxford                                  | Nuffield Department of Medicine | Centre for Medicines Discovery, University of Oxford, ORCRB, Roosevelt Drive, Oxford, Oxon, OX3 7DQ, UK                                                                                            | lizbe.koekemoer@cmd.ox.ac.uk   |
| <b>TOBIAS KROJER</b>    | University of Oxford                                  | Nuffield Department of Medicine | Centre for Medicines Discovery, University of Oxford, ORCRB, Roosevelt Drive, Oxford, Oxon, OX3 7DQ, UK                                                                                            | tobias.krojer@cmd.ox.ac.uk     |

|                             |                      |                                 |                                                                                                         |                               |
|-----------------------------|----------------------|---------------------------------|---------------------------------------------------------------------------------------------------------|-------------------------------|
| <b>MIKE FAIRHEAD</b>        | University of Oxford | Nuffield Department of Medicine | Centre for Medicines Discovery, University of Oxford, ORCRB, Roosevelt Drive, Oxford, Oxon, OX3 7DQ, UK | michael.fairhead@cmd.ox.ac.uk |
| <b>ELIZABETH M. MACLEAN</b> | University of Oxford | Nuffield Department of Medicine | Centre for Medicines Discovery, University of Oxford, ORCRB, Roosevelt Drive, Oxford, Oxon, OX3 7DQ, UK | beth.maclean@cmd.ox.ac.uk     |
| <b>ANDREW THOMPSON</b>      | University of Oxford | Nuffield Department of Medicine | Centre for Medicines Discovery, University of Oxford, ORCRB, Roosevelt Drive, Oxford, Oxon, OX3 7DQ, UK | andrew.thompson@cmd.ox.ac.uk  |
| <b>CONOR FRANCIS WILD</b>   | University of Oxford | Nuffield Department of Medicine | Centre for Medicines Discovery, University of Oxford, ORCRB, Roosevelt Drive, Oxford, Oxon, OX3 7DQ, UK | conor.wild@cmd.ox.ac.uk       |
| <b>MIHAELA D. SMILOVA</b>   | University of Oxford | Nuffield Department of Medicine | Centre for Medicines Discovery, University of Oxford, ORCRB, Roosevelt Drive, Oxford, Oxon, OX3 7DQ, UK | mihaela.smilova@cmd.ox.ac.uk  |
| <b>NATHAN WRIGHT</b>        | University of Oxford | Nuffield Department of Medicine | Centre for Medicines Discovery, University of Oxford, ORCRB, Roosevelt Drive, Oxford, Oxon, OX3 7DQ, UK | nathan.wright@cmd.ox.ac.uk    |
| <b>ANNETTE VON DELFT</b>    | University of Oxford | Nuffield Department of Medicine | Centre for Medicines Discovery, University of Oxford, ORCRB, Roosevelt Drive,                           | annette.vondelft@cmd.ox.ac.uk |

|                               |                                                     |                                 |                                                                                                         |                                     |
|-------------------------------|-----------------------------------------------------|---------------------------------|---------------------------------------------------------------------------------------------------------|-------------------------------------|
|                               |                                                     |                                 | Oxford, Oxon, OX3 7DQ, UK                                                                               |                                     |
| <b>CARINA GILEADI</b>         | University of Oxford                                | Nuffield Department of Medicine | Centre for Medicines Discovery, University of Oxford, ORCRB, Roosevelt Drive, Oxford, Oxon, OX3 7DQ, UK | carina.gileadi@cmd.ox.ac.uk         |
| <b>VICTOR L. RANGEL</b>       | School of Pharmaceutical Sciences of Ribeirao Preto | Pharmaceutical Sciences         | Avenida do Café, s/nºRibeirão Preto - SP/CEP 14040-903                                                  | victor.rangel@usp.br                |
| <b>CHRIS SCHOFIELD</b>        | University of Oxford                                | Department of Chemistry         | Chemistry Research Laboratory, 12 Mansfield Rd, Oxford OX1 3TA, United Kingdom                          | christopher.schofield@chem.ox.ac.uk |
| <b>EIDARUS SALAH</b>          | University of Oxford                                | Department of Chemistry         | Chemistry Research Laboratory, 12 Mansfield Rd, Oxford OX1 3TA, United Kingdom                          | eidarus.salah@chem.ox.ac.uk         |
| <b>TIKA R. MALLA</b>          | University of Oxford                                | Department of Chemistry         | Chemistry Research Laboratory, 12 Mansfield Rd, Oxford OX1 3TA, United Kingdom                          | tika.malla@chem.ox.ac.uk            |
| <b>ANTHONY TUMBER</b>         | University of Oxford                                | Department of Chemistry         | Chemistry Research Laboratory, 12 Mansfield Rd, Oxford OX1 3TA, United Kingdom                          | anthony.tumber@chem.ox.ac.uk        |
| <b>TOBIAS JOHN</b>            | University of Oxford                                | Department of Chemistry         | Chemistry Research Laboratory, 12 Mansfield Rd, Oxford OX1 3TA, United Kingdom                          | tobias.john@chem.ox.ac.uk           |
| <b>IOANNIS VAKONAKIS</b>      | University of Oxford                                | Department of Biochemistry      | South Parks Road, Oxford OX1 3QU                                                                        | ioannis.vakonakis@bioch.ox.ac.uk    |
| <b>ANASTASSIA L. KANTSADI</b> | University of Oxford                                | Department of Biochemistry      | South Parks Road, Oxford OX1 3QU                                                                        | anastassia.kantsadi@bioch.ox.ac.uk  |
| <b>NICOLE ZITZMANN</b>        | University of Oxford                                | Department of Biochemistry      | Oxford Glycobiology Institute; South Parks Road, Oxford OX1 3QU                                         | nicole.zitzmann@bioch.ox.ac.uk      |

|                           |                                   |                                    |                                                                                                                                                |                                |
|---------------------------|-----------------------------------|------------------------------------|------------------------------------------------------------------------------------------------------------------------------------------------|--------------------------------|
| <b>JULIANE BRUN</b>       | University of Oxford              | Department of Biochemistry         | Oxford Glycobiology Institute; South Parks Road, Oxford OX1 3QU                                                                                | juliane.brun@path.ox.ac.uk     |
| <b>J. L. KIAPPES</b>      | University of Oxford              | Department of Biochemistry         | Oxford Glycobiology Institute; South Parks Road, Oxford OX1 3QU                                                                                | john.kiappes@bioch.ox.ac.uk    |
| <b>MICHELLE HILL</b>      | University of Oxford              | Department of Biochemistry         | Oxford Glycobiology Institute; South Parks Road, Oxford OX1 3QU                                                                                | michelle.hill@bioc h.ox.ac.uk  |
| <b>KAROLINA D WITT</b>    | University of Oxford              | Department of Biochemistry         | Oxford Glycobiology Institute; South Parks Road, Oxford OX1 3QU                                                                                | karolina.witt@bioc h.ox.ac.uk  |
| <b>DOMINIC S ALONZI</b>   | University of Oxford              | Department of Biochemistry         | Oxford Glycobiology Institute; South Parks Road, Oxford OX1 3QU                                                                                | dominic.alonzi@bi och.ox.ac.uk |
| <b>LAETITIA L MAKOWER</b> | University of Oxford              | Department of Biochemistry         | Oxford Glycobiology Institute; South Parks Road, Oxford OX1 3QU                                                                                | lettymakower@g mail.com        |
| <b>FINNY S. VARGHESE</b>  | Radboud University Medical Center | Department of Medical Microbiology | Radboud Institute for Molecular Life Sciences, Radboud University Medical Center, Geert Grooteplein Zuid 28, 6525 GA Nijmegen, The Netherlands | F.Varghese@uniq ure.com        |
| <b>GIJS J. OVERHEUL</b>   | Radboud University Medical Center | Department of Medical Microbiology | Radboud Institute for Molecular Life Sciences, Radboud University Medical Center, Geert Grooteplein Zuid 28, 6525 GA Nijmegen, The Netherlands | Gijs.Overheul@r adboudumc.nl   |
| <b>PASCAL MIESEN</b>      | Radboud University Medical Center | Department of Medical Microbiology | Radboud Institute for Molecular Life Sciences, Radboud University Medical                                                                      | pascal.miesen@r adboudumc.nl   |

|                               |                                        |                                           |                                                                                                                                                |                                      |
|-------------------------------|----------------------------------------|-------------------------------------------|------------------------------------------------------------------------------------------------------------------------------------------------|--------------------------------------|
|                               |                                        |                                           | Center, Geert Grooteplein Zuid 28, 6525 GA Nijmegen, The Netherlands                                                                           |                                      |
| <b>RONALD P. VAN RIJ</b>      | Radboud University Medical Center      | Department of Medical Microbiology        | Radboud Institute for Molecular Life Sciences, Radboud University Medical Center, Geert Grooteplein Zuid 28, 6525 GA Nijmegen, The Netherlands | ronald.vanrij@radboudumc.nl          |
| <b>JITSKE JANSEN</b>          | Radboud University Medical Center      | Department of Pathology                   | Radboud Institute for Molecular Life Sciences, Radboud University Medical Center, Geert Grooteplein Zuid 28, 6525 GA Nijmegen, The Netherlands | Jitske.Jansen@radboudumc.nl          |
| <b>BART SMEETS</b>            | Radboud University Medical Center      | Department of Pathology                   | Radboud Institute for Molecular Life Sciences, Radboud University Medical Center, Geert Grooteplein Zuid 28, 6525 GA Nijmegen, The Netherlands | Bart.Smeets@radboudumc.nl            |
| <b>SUSANA TOMÁSIO</b>         | Collaborative Drug Discovery           |                                           | 20 Station Rd, Cambridge, CB1 2JD, UK                                                                                                          | Stomasio@collaboratedrug.com         |
| <b>CHARLIE WEATHERALL</b>     | Collaborative Drug Discovery           |                                           | 1633 Bayshore Hwy, Burlingame, CA 94010, USA                                                                                                   | cweatherall@collaboratedrug.com      |
| <b>MARIANA VASCHETTO</b>      | Collaborative Drug Discovery           |                                           | 20 Station Rd, Cambridge CB1 2JD, UK                                                                                                           | mariana@collaboratedrug.com          |
| <b>HANNAH BRUCE MACDONALD</b> | Memorial Sloan Kettering Cancer Center | Computational and Systems Biology Program | 1275 York Ave, New York, NY 10065                                                                                                              | hannah.brucemacdonald@choderalab.org |
| <b>JOHN D. CHODERA</b>        | Memorial Sloan Kettering Cancer Center | Computational and Systems Biology Program | Memorial Sloan Kettering Cancer Center                                                                                                         | john.chodera@choderalab.org          |
| <b>DOMINIC RUFA</b>           | Memorial Sloan Kettering Cancer Center | Memorial Sloan Kettering Cancer Center    | 1275 York Ave, New York, NY 10065                                                                                                              | dominic.rufa@choderalab.org          |

|                             |                                                                          |                                                  |                                                                         |                                                                                    |
|-----------------------------|--------------------------------------------------------------------------|--------------------------------------------------|-------------------------------------------------------------------------|------------------------------------------------------------------------------------|
| <b>MATTHEW WITTMANN</b>     | Memorial Sloan Kettering Cancer Center                                   | Computational and Systems Biology Program        | 1275 York Ave, New York, NY 10065                                       | matt.wittmann@choderalab.org                                                       |
| <b>MELISSA L. BOBY</b>      | Memorial Sloan Kettering Cancer Center;Weil Cornell Medical College      | Weil Cornell Graduate School of Medical Sciences | 1275 York Ave, New York, NY 10065                                       | melissa.boby@choderalab.org                                                        |
| <b>MICHAEL HENRY</b>        | Memorial Sloan Kettering Cancer Center                                   | Memorial Sloan Kettering Cancer Center           | Memorial Sloan Kettering Cancer Center                                  | mike.henry@choderalab.org                                                          |
| <b>WILLIAM G. GLASS</b>     | Memorial Sloan Kettering Cancer Center                                   | Computational and Systems Biology Program        | 1275 York Ave, New York, NY 10065                                       | william.glass@choderalab.org                                                       |
| <b>PETER K. EASTMAN</b>     | Department of Bioengineering until Sept. 1, then Department of Chemistry | Stanford University                              | 11 Mill Site Road, Scotts Valley, CA 95066                              | peastman@stanford.edu                                                              |
| <b>JOSEPH E. COFFLAND</b>   | N/A                                                                      | Cauldron Development LLC                         | 523 6th Street, Petaluma, CA 94952                                      | <a href="mailto:joseph@cauldrondevelopment.com">joseph@cauldrondevelopment.com</a> |
| <b>DAVID L. DOTSON</b>      | N/A                                                                      | Datryllic LLC                                    | 280 W. McKinley St., #314, Phoenix AZ, 85003                            | <a href="mailto:david@datryllic.com">david@datryllic.com</a>                       |
| <b>ED J. GRIFFEN</b>        | MedChemica Ltd                                                           | Research and Development                         | Alderley Park, Macclesfield, Cheshire. SK10 4TG UK.                     | ed.griffen@medchemica.com                                                          |
| <b>WILLIAM MCCORKINDALE</b> | University of Cambridge                                                  | Cavendish Laboratory                             | 19 JJ Thomson Avenue, Cambridge, CB3 0HE UK                             |                                                                                    |
| <b>AARON MORRIS</b>         | PostEra Inc                                                              | CEO                                              | 2 Embarcadero Center, 8th Floor, San Francisco, CA 94111, United States | aaron.morris@postera.ai                                                            |
| <b>ROBERT GLEN</b>          | University of Cambridge                                                  | Department of Chemistry                          | Lensfield Road, Cambridge, CB21EW, United Kingdom                       | rcg28@cam.ac.uk                                                                    |
| <b>JASON COLE</b>           | Cambridge Crystallographic Datacentre                                    |                                                  | 12 Union Road, Cambridge, CB2 1EZ, United Kingdom                       | cole@ccdc.cam.ac.uk                                                                |
| <b>RICHARD FOSTER</b>       | University of Leeds                                                      | School of Chemistry                              | Leeds, LS2 9JT, United Kingdom                                          | R.Foster@leeds.ac.uk                                                               |
| <b>HOLLY FOSTER</b>         | University of Leeds                                                      | School of Chemistry                              | Leeds, LS2 9JT, United Kingdom                                          | cm13hf@leeds.ac.uk                                                                 |
| <b>MARK CALMIANO</b>        | UCB                                                                      |                                                  | 216 Bath Road, Slough, SL1 3WE, United Kingdom                          | mark.calmiano@ucb.com                                                              |
| <b>RACHAEL E. TENNANT</b>   | Lhasa Limited                                                            |                                                  | Granary Wharf House, 2 Canal                                            | Rachael.Tennant@lhasalimited.org                                                   |

|                                |                               |                                       |                                                                                                                               |                                                   |
|--------------------------------|-------------------------------|---------------------------------------|-------------------------------------------------------------------------------------------------------------------------------|---------------------------------------------------|
|                                |                               |                                       | Wharf, Holbeck,<br>Leeds LS11<br>5PS, United<br>Kingdom                                                                       |                                                   |
| <b>JAG HEER</b>                | UCB                           |                                       | 216 Bath Road,<br>Slough, SL1 3WE,<br>United Kingdom                                                                          | jag.heer@ucb.co<br>m                              |
| <b>JIYE SHI</b>                | UCB                           |                                       | 216 Bath Road,<br>Slough, SL1 3WE,<br>United Kingdom                                                                          | jiye.shi@ucb.com                                  |
| <b>ERIC JNOFF</b>              | UCB                           |                                       | Chemin du<br>Foriest, 1420<br>Braine-l'Alleud,<br>Belgium                                                                     | eric.jnoff@ucb.co<br>m                            |
| <b>MATTHEW F.D.<br/>HURLEY</b> | Temple University             | Department of<br>Chemistry            | 1901 N 13th st.<br>Philadelphia, PA<br>19122                                                                                  | matthew.hurley@t<br>emple.edu                     |
| <b>BRUCE A.<br/>LEFKER</b>     | Thames Pharma<br>Partners LLC |                                       | 1 Conrad Street,<br>Mystic, CT 06355,<br>USA                                                                                  | bruce.lefker@tha<br>mespharmapartne<br>rs.com     |
| <b>RALPH P.<br/>ROBINSON</b>   | Thames Pharma<br>Partners LLC |                                       | 1 Conrad Street,<br>Mystic, CT 06355,<br>USA                                                                                  | ralph.p.robinson@<br>thamespharmapar<br>tners.com |
| <b>CHARLINE<br/>GIROUD</b>     | University of<br>Oxford       | Nuffield<br>Department of<br>Medicine | Centre for<br>Medicines<br>Discovery &<br>Target<br>Discovery<br>Institute,<br>University of<br>Oxford, Oxford<br>OX3 7FZ, UK | charline.giroud@c<br>md.ox.ac.uk                  |
| <b>JAMES<br/>BENNETT</b>       | University of<br>Oxford       | Nuffield<br>Department of<br>Medicine | Centre for<br>Medicines<br>Discovery &<br>Target<br>Discovery<br>Institute,<br>University of<br>Oxford, Oxford<br>OX3 7FZ, UK | james.bennett@c<br>md.ox.ac.uk                    |
| <b>OLEG FEDOROV</b>            | University of<br>Oxford       | Nuffield<br>Department of<br>Medicine | Centre for<br>Medicines<br>Discovery &<br>Target<br>Discovery<br>Institute,<br>University of<br>Oxford, Oxford<br>OX3 7FZ, UK | oleg.fedorov@cm<br>d.ox.ac.uk                     |

|                              |                                           |                                                                          |                                                                                                                                    |                                                                  |
|------------------------------|-------------------------------------------|--------------------------------------------------------------------------|------------------------------------------------------------------------------------------------------------------------------------|------------------------------------------------------------------|
| <b>ST PATRICK REID</b>       | Department of Pathology and Microbiology  | University of Nebraska Medical Centre                                    | 985900 Nebraska Medical Center, Omaha, NE 68198-5900, USA                                                                          | patrick.reid@unmc.edu                                            |
| <b>MELODY JANE MORWITZER</b> | Department of Pathology and Microbiology  | University of Nebraska Medical Centre                                    | 985900 Nebraska Medical Center, Omaha, NE 68198-5900, USA                                                                          |                                                                  |
| <b>LISA COX</b>              | Life Compass Consulting Ltd               | Project Management                                                       | 26 Millers Meadow, Rainow, Macclesfield. SK10 5UE                                                                                  | lisa@lifecompassconsulting.co.uk                                 |
| <b>GARRETT M. MORRIS</b>     | University of Oxford                      | Department of Statistics                                                 | 24-29 St Giles', Oxford OX1 3LB, UK                                                                                                | <a href="mailto:morris@stats.ox.ac.uk">morris@stats.ox.ac.uk</a> |
| <b>MATTEO FERLA</b>          | University of Oxford                      | Nuffield Department of Medicine                                          | Wellcome Centre for Human Genetics, Roosevelt Drive, Oxford OX3 7BN, UK                                                            | matteo@well.ox.ac.uk                                             |
| <b>DEMETRI MOUSTAKAS</b>     | Relay Therapeutics                        |                                                                          |                                                                                                                                    | dmoustakas@relaytx.com                                           |
| <b>TIM DUDGEON</b>           | Informatics Matters                       |                                                                          |                                                                                                                                    | tdudgeon@informaticsmatters.com                                  |
| <b>VLADIMÍR PŠENÁK</b>       | M2M solutions, s.r.o                      |                                                                          | Vysokoškólákov 1757/1, 010 01 Žilina, Slovenská republika                                                                          | vladimir.psenak@m2ms.sk                                          |
| <b>BORIS KOVAR</b>           | M2M solutions, s.r.o                      |                                                                          | Vysokoškólákov 1757/1, 010 01 Žilina, Slovenská republika                                                                          | boris.kovar@m2ms.sk                                              |
| <b>VINCENT VOELZ</b>         | Temple University                         |                                                                          |                                                                                                                                    | voelz@temple.edu                                                 |
| <b>ANNA CARBERY</b>          | University of Oxford;Diamond Light Source | Department of Statistics                                                 | 24-29 St Giles', Oxford OX1 3LB, UK; Diamond Light Source, Harwell Science and Innovation Campus, Didcot, OX11 0DE, United Kingdom | anna.carbery@lmh.ox.ac.uk                                        |
| <b>ALESSANDRO CONTINI</b>    | University of Milan                       | DISFARM - Sezione di Chimica Generale e Organica "Alessandro Marchesini" | Via Venezian, 21 20133 Milano                                                                                                      | Alessandro.Contini@unimi.it                                      |
| <b>AUSTIN CLYDE</b>          | Argonne National Laboratory               |                                                                          |                                                                                                                                    | aclyde@anl.gov                                                   |



|                           |                                           |  |                                                |                            |
|---------------------------|-------------------------------------------|--|------------------------------------------------|----------------------------|
| <b>AMIR BEN-SHMUEL</b>    | Israel Institution of Biological Research |  | Ness-Ziona, Israel                             | amirb@iibr.gov.il          |
| <b>ASSA SITTNER</b>       | Israel Institution of Biological Research |  | Ness-Ziona, Israel                             | assas@iibr.gov.il          |
| <b>BOAZ POLITI</b>        | Israel Institution of Biological Research |  | Ness-Ziona, Israel                             | boazp@iibr.gov.il          |
| <b>EINAT B. VITNER</b>    | Israel Institution of Biological Research |  | Ness-Ziona, Israel                             | einatv@iibr.gov.il         |
| <b>ELAD BAR-DAVID</b>     | Israel Institution of Biological Research |  | Ness-Ziona, Israel                             | eladb@iibr.gov.il          |
| <b>HADAS TAMIR</b>        | Israel Institution of Biological Research |  | Ness-Ziona, Israel                             | hadast@iibr.gov.il         |
| <b>HAGIT ACHDOUT</b>      | Israel Institution of Biological Research |  | Ness-Ziona, Israel                             | hagita@iibr.gov.il         |
| <b>HAIM LEVY</b>          | Israel Institution of Biological Research |  | Ness-Ziona, Israel                             | haiml@iibr.gov.il          |
| <b>ITAI GLINERT</b>       | Israel Institution of Biological Research |  | Ness-Ziona, Israel                             | itaig@iibr.gov.il          |
| <b>NIR PARAN</b>          | Israel Institution of Biological Research |  | Ness-Ziona, Israel                             | nirp@iibr.gov.il           |
| <b>NOAM EREZ</b>          | Israel Institution of Biological Research |  | Ness-Ziona, Israel                             | noame@iibr.gov.il          |
| <b>REUT PUNI</b>          | Israel Institution of Biological Research |  | Ness-Ziona, Israel                             | reutp@iibr.gov.il          |
| <b>SHARON MELAMED</b>     | Israel Institution of Biological Research |  | Ness-Ziona, Israel                             | sharonm@iibr.gov.il        |
| <b>SHAY WEISS</b>         | Israel Institution of Biological Research |  | Ness-Ziona, Israel                             | shayw@iibr.gov.il          |
| <b>TOMER ISRAELY</b>      | Israel Institution of Biological Research |  | Ness-Ziona, Israel                             | tomeri@iibr.gov.il         |
| <b>YFAT YAHALOM-RONEN</b> | Israel Institution of Biological Research |  | Ness-Ziona, Israel                             | yfatyr@iibr.gov.il         |
| <b>ADAM SMALLEY</b>       | UCB                                       |  | 216 Bath Road, Slough, SL1 3WE, United Kingdom | adam.smalley@ucb.com       |
| <b>VLADAS OLEINIKOVAS</b> | UCB                                       |  | 216 Bath Road, Slough, SL1 3WE, United Kingdom | vladas.oleinikovas@ucb.com |

|                             |                                                  |                                                                                                                                             |                                                                                    |                                                                    |
|-----------------------------|--------------------------------------------------|---------------------------------------------------------------------------------------------------------------------------------------------|------------------------------------------------------------------------------------|--------------------------------------------------------------------|
| <b>JOHN SPENCER</b>         | University of Sussex                             | Department of Chemistry, School of Life Sciences,                                                                                           | University of Sussex Falmer, Brighton, East Sussex, BN1 9QJ, UK.                   | J.Spencer@sussex.ac.uk                                             |
| <b>PETER W. KENNY</b>       |                                                  |                                                                                                                                             | Berwick-on-Sea, North Coast Road, Blanchisseuse, Saint George, Trinidad and Tobago | <a href="mailto:pwk.pub.2008@gmail.com">pwk.pub.2008@gmail.com</a> |
| <b>WALTER WARD</b>          | Walter Ward Consultancy & Training               | Enzymology                                                                                                                                  |                                                                                    | wal.ward@hotmail.co.uk                                             |
| <b>EMMA CATTERMOLE</b>      | University of Oxford                             | Department of Biochemistry                                                                                                                  | South Parks Road, Oxford OX1 3QU                                                   | emma.cattermole@bioch.ox.ac.uk                                     |
| <b>LORI FERRINS</b>         | Northeastern University                          | Department of Chemistry and Chemical Biology                                                                                                |                                                                                    | l.ferrins@northeastern.edu                                         |
| <b>CHARLES J. EYERMANN</b>  | Northeastern University                          | Department of Chemistry and Chemical Biology                                                                                                |                                                                                    | c.eyermann@northeastern.edu                                        |
| <b>BRUCE F. MILNE</b>       | University of Coimbra and University of Aberdeen | CFisUC, Department of Physics, University of Coimbra; Department of Chemistry, University of Aberdeen, Old Aberdeen, AB24 3UE, Scotland, UK | Rua Larga, 3004-516 Coimbra, Portugal ; Old Aberdeen, AB24 3UE Scotland, UK        | bfmilne@uc.pt ; bruce.milne@abdn.ac.uk                             |
| <b>ANDRE S. GODOY</b>       | University of Sao Paulo                          | Sao Carlos Institute of Physics                                                                                                             | Av. Joao Dagnone, 1100 , Sao Carlos, 13563-120, Brazil                             | andregodoy@ifsc.usp.br                                             |
| <b>GABRIELA D. NOSKE</b>    | University of Sao Paulo                          | Sao Carlos Institute of Physics                                                                                                             | Av. Joao Dagnone, 1100 , Sao Carlos, 13563-120, Brazil                             | gabriela.noske@usp.br                                              |
| <b>GLAUCIUS OLIVA</b>       | University of Sao Paulo                          | Sao Carlos Institute of Physics                                                                                                             | Av. Joao Dagnone, 1100 , Sao Carlos, 13563-120, Brazil                             | oliva@ifsc.usp.br                                                  |
| <b>RAFAELA S. FERNANDES</b> | University of Sao Paulo                          | Sao Carlos Institute of Physics                                                                                                             | Av. Joao Dagnone, 1100 , Sao Carlos, 13563-120, Brazil                             | rafaela.fernandes@usp.br                                           |
| <b>ALINE M. NAKAMURA</b>    | University of Sao Paulo                          | Sao Carlos Institute of Physics                                                                                                             | Av. Joao Dagnone, 1100 , Sao Carlos, 13563-120, Brazil                             | aline.nakamura@ifsc.usp.br                                         |
| <b>VICTOR O. GAWRILJUK</b>  | University of Sao Paulo                          | Sao Carlos Institute of Physics                                                                                                             | Av. Joao Dagnone, 1100 ,                                                           | victor.gawriljuk.oliveira@usp.br                                   |

|                                      |                                                   |                                                                                                                                                                                                                                                                                            |                                                                                                                                   |                                                                                   |
|--------------------------------------|---------------------------------------------------|--------------------------------------------------------------------------------------------------------------------------------------------------------------------------------------------------------------------------------------------------------------------------------------------|-----------------------------------------------------------------------------------------------------------------------------------|-----------------------------------------------------------------------------------|
|                                      |                                                   |                                                                                                                                                                                                                                                                                            | Sao Carlos,<br>13563-120, Brazil                                                                                                  |                                                                                   |
| <b>KRIS M. WHITE</b>                 | Icahn School of<br>Medicine at<br>Mount Sinai     | Icahn School of<br>Medicine                                                                                                                                                                                                                                                                | 1 Gustave L. Levy<br>Pl., New York, NY<br>10021                                                                                   | kris.white@mssm.<br>edu                                                           |
| <b>BRIANA L.<br/>MCGOVERN</b>        | Icahn School of<br>Medicine at<br>Mount Sinai     | Icahn School of<br>Medicine                                                                                                                                                                                                                                                                | 1 Gustave L. Levy<br>Pl., New York, NY<br>10021                                                                                   | briana.mcgovern<br>@mssm.edu                                                      |
| <b>ROMEL<br/>ROSALES</b>             | Icahn School of<br>Medicine at<br>Mount Sinai     | Icahn School of<br>Medicine                                                                                                                                                                                                                                                                | 1 Gustave L. Levy<br>Pl., New York, NY<br>10021                                                                                   | romel.rosales@m<br>ssm.edu                                                        |
| <b>ADOLFO<br/>GARCIA-<br/>SASTRE</b> | Icahn School of<br>Medicine at<br>Mount Sinai     | 1. Department of<br>Microbiology, 2.<br>Global Health and<br>Emerging<br>Pathogens<br>Institute, 3.<br>Department of<br>Medicine, Division<br>of Infectious<br>Diseases, 4. The<br>Tisch Cancer<br>Institute, 5.<br>Department of<br>Pathology,<br>Molecular and<br>Cell-Based<br>Medicine | 1468 Madison<br>Avenue, New<br>York, NY 10029,<br>USA                                                                             | adolfo.garcia-<br>sastre@mssm.edu                                                 |
| <b>DANIEL CARNEY</b>                 | Takeda<br>Development<br>Center Americas,<br>Inc. |                                                                                                                                                                                                                                                                                            | 6381 Towne<br>Centre Drive, San<br>Diego, CA 92121,<br>USA                                                                        | <a href="mailto:daniel.carney@takeda.com">daniel.carney@ta<br/>keda.com</a>       |
| <b>EDCON CHANG</b>                   | Takeda<br>Development<br>Center Americas,<br>Inc. |                                                                                                                                                                                                                                                                                            | 6381 Towne<br>Centre Drive, San<br>Diego, CA 92121,<br>USA                                                                        | <a href="mailto:edcon.chang@takeda.com">edcon.chang@ta<br/>keda.com</a>           |
| <b>KUMAR SINGH<br/>SAIKATENDU</b>    | Takeda<br>Development<br>Center Americas,<br>Inc. |                                                                                                                                                                                                                                                                                            | 6381 Towne<br>Centre Drive, San<br>Diego, CA 92121,<br>USA                                                                        | <a href="mailto:kumar.saikatendu@takeda.com">kumar.saikatend<br/>u@takeda.com</a> |
| <b>LAURA<br/>VANGEEL</b>             | Katholieke<br>Universiteit<br>Leuven              | Department of<br>Microbiology,<br>Immunology and<br>Transplantation                                                                                                                                                                                                                        | Rega Institute for<br>Medical<br>Research,<br>Herestraat 49,<br>Laboratory of<br>Virology and<br>Chemotherapy,<br>Leuven, Belgium | laura.vangeel@ku<br>leuven.be                                                     |
| <b>JOHAN NEYTS</b>                   | Katholieke<br>Universiteit<br>Leuven              | Department of<br>Microbiology,<br>Immunology and<br>Transplantation                                                                                                                                                                                                                        | Rega Institute for<br>Medical<br>Research,<br>Herestraat 49,                                                                      | johan.neyts@kule<br>uven.be                                                       |

|                               |                                          |                                                            |                                                                                                              |                                                                                      |
|-------------------------------|------------------------------------------|------------------------------------------------------------|--------------------------------------------------------------------------------------------------------------|--------------------------------------------------------------------------------------|
|                               |                                          |                                                            | Laboratory of Virology and Chemotherapy, Leuven, Belgium                                                     |                                                                                      |
| <b>KIM DONCKERS</b>           | Katholieke Universiteit Leuven           | Department of Microbiology, Immunology and Transplantation | Rega Institute for Medical Research, Herestraat 49, Laboratory of Virology and Chemotherapy, Leuven, Belgium | kim.donckers@kuleuven.be                                                             |
| <b>DIRK JOCHMANS</b>          | Katholieke Universiteit Leuven           | Department of Microbiology, Immunology and Transplantation | Rega Institute for Medical Research, Herestraat 49, Laboratory of Virology and Chemotherapy, Leuven, Belgium | dirk.jochmans@kuleuven.be                                                            |
| <b>STEVEN DE JONGHE</b>       | Katholieke Universiteit Leuven           | Department of Microbiology, Immunology and Transplantation | Rega Institute for Medical Research, Herestraat 49, Laboratory of Virology and Chemotherapy, Leuven, Belgium | steven.dejonghe@kuleuven.be                                                          |
| <b>GREGORY R. BOWMAN</b>      | Washington University School of Medicine | Dept of Biochemistry & Molecular Biophysics                | 4523 Clayton Ave, St. Louis, MO 63110                                                                        | <a href="mailto:g.bowman@wustl.edu">g.bowman@wustl.edu</a>                           |
| <b>BRUCE BORDEN</b>           | Folding@home Consortium                  |                                                            |                                                                                                              | borden.b@gmail.com                                                                   |
| <b>SUKRIT SINGH</b>           | Memorial Sloan Kettering Cancer Center   | Computational and Systems Biology Program                  | 1275 York Ave, New York, NY 10065                                                                            | sukrit.singh@choderalab.org                                                          |
| <b>ANDREA VOLKAMER</b>        | Charité Universitätsmedizin in Berlin    | In silico Toxicology and Structural Bioinformatics         | Virchowweg 6, 10117 Berlin, Germany                                                                          | andrea.volkamer@charite.de                                                           |
| <b>JAIME RODRIGUEZ-GUERRA</b> | Charité Universitätsmedizin in Berlin    | In silico Toxicology and Structural Bioinformatics         | Virchowweg 6, 10117 Berlin, Germany                                                                          | jaime.rogue@gmail.com                                                                |
| <b>GWEN FATE</b>              | Thames Pharma Partners                   | Medicinal Chemistry                                        | 1 Conrad Street, Mystic, CT 06355, USA                                                                       | <a href="mailto:g.fate@thamespharmapartners.com">g.fate@thamespharmapartners.com</a> |
| <b>STORM HASSELL HART</b>     | University of Sussex                     | Department of Chemistry, School of Life Sciences,          | University of Sussex Falmer, Brighton, East Sussex, BN1 9QJ, UK.                                             | S.Hassell-Hart@sussex.ac.uk                                                          |

|                               |                         |                              |                                                     |                                                          |
|-------------------------------|-------------------------|------------------------------|-----------------------------------------------------|----------------------------------------------------------|
| <b>VITALIY A. BILENKO</b>     | Enamine Ltd             | Medicinal Chemistry          | 78 Chervonotkatska Street, 02094 Kyiv, Ukraine      | v.bilenko@mail.enamine.net                               |
| <b>SERHII O. KINAKH</b>       | Enamine Ltd             | Medicinal Chemistry          | 78 Chervonotkatska Street, 02094 Kyiv, Ukraine      | s.kinakh@mail.enamine.net                                |
| <b>IVAN G. LOGVINENKO</b>     | Enamine Ltd             | Medicinal Chemistry          | 78 Chervonotkatska Street, 02094 Kyiv, Ukraine      | i.logvinenko@mail.enamine.net                            |
| <b>KOSTIANTYN P. MELNYKOV</b> | Enamine Ltd             | Medicinal Chemistry          | 78 Chervonotkatska Street, 02094 Kyiv, Ukraine      | k.melnykov@mail.enamine.net                              |
| <b>VICTOR D. HULIAK</b>       | Enamine Ltd             | Medicinal Chemistry          | 78 Chervonotkatska Street, 02094 Kyiv, Ukraine      | v.huliak@mail.enamine.net                                |
| <b>IGOR S. TSURUPA</b>        | Enamine Ltd             | Medicinal Chemistry          | 78 Chervonotkatska Street, 02094 Kyiv, Ukraine      | i.tsurupa@mail.enamine.net                               |
| <b>KADI SAAR</b>              | University of Cambridge | Cavandish Laboratory         | JJ Thomson Ave, Cambridge CB3 0HE                   | kls78@cam.ac.uk                                          |
| <b>BENJAMIN PERRY</b>         | DNDi                    | Research and Development     | 15 Chemin Camille Vidart, 1202 Geneva, Switzerland  | bperry@dndi.org                                          |
| <b>LAURENT FRAISSE</b>        | DNDi                    | Research and Development     | 15 Chemin Camille Vidart, 1202 Geneva, Switzerland  | <a href="mailto:lfraisse@dndi.org">lfraisse@dndi.org</a> |
| <b>PETER SJÖ</b>              | DNDi                    | Research and Development     | 15 Chemin Camille Vidart, 1202 Geneva, Switzerland  | <a href="mailto:psjo@dndi.org">psjo@dndi.org</a>         |
| <b>PASCALE BOULET</b>         | DNDi                    | Operations                   | 15 Chemin Camille Vidart, 1202 Geneva, Switzerland  | <a href="mailto:pboulet@dndi.org">pboulet@dndi.org</a>   |
| <b>SOPHIE HAHN</b>            | DNDi                    | External Affairs             | 15 Chemin Camille Vidart, 1202 Geneva, Switzerland  | <a href="mailto:shahn@dndi.org">shahn@dndi.org</a>       |
| <b>CHARLES MOWBRAY</b>        | DNDi                    | Research and Development     | 15 Chemin Camille Vidart, 1202 Geneva, Switzerland  | <a href="mailto:cmowbray@dndi.org">cmowbray@dndi.org</a> |
| <b>LAUREN REID</b>            | MedChemica Ltd          | Senior Computational Chemist | Alderley Park, Macclesfield, Cheshire. SK10 4TG UK. |                                                          |

|                                |                                                                   |                                                |                                                                                                                                                                                                                                              |                                     |
|--------------------------------|-------------------------------------------------------------------|------------------------------------------------|----------------------------------------------------------------------------------------------------------------------------------------------------------------------------------------------------------------------------------------------|-------------------------------------|
| <b>PAUL REES</b>               | Compass<br>Business<br>Partners Ltd                               |                                                |                                                                                                                                                                                                                                              | paulhrees@gmail.<br>com             |
| <b>QIU YU JUDY<br/>HUANG</b>   | University of<br>Massachusetts<br>Chan Medical<br>School          | Biochemistry and<br>Molecular<br>Biotechnology | 55 N Lake Ave,<br>Worcester MA<br>01655                                                                                                                                                                                                      | qiuyu.huang@um<br>assmed.edu        |
| <b>SARAH N<br/>ZVORNICANIN</b> | University of<br>Massachusetts<br>Chan Medical<br>School          | Biochemistry and<br>Molecular<br>Biotechnology | 55 N Lake Ave,<br>Worcester MA<br>01655                                                                                                                                                                                                      | sarah.duggan@u<br>massmed.edu       |
| <b>ALA M. SHAQRA</b>           | University of<br>Massachusetts<br>Chan Medical<br>School          | Biochemistry and<br>Molecular<br>Biotechnology | 55 N Lake Ave,<br>Worcester MA<br>01655                                                                                                                                                                                                      | Ala.Shaqra@uma<br>ssmed.edu         |
| <b>NESE KURT<br/>YILMAZ</b>    | University of<br>Massachusetts<br>Chan Medical<br>School          | Biochemistry and<br>Molecular<br>Biotechnology | 55 N Lake Ave,<br>Worcester MA<br>01655                                                                                                                                                                                                      | Nese.KurtYilmaz<br>@umassmed.edu    |
| <b>CELIA A.<br/>SCHIFFER</b>   | University of<br>Massachusetts<br>Chan Medical<br>School          | Biochemistry and<br>Molecular<br>Biotechnology | 55 N Lake Ave,<br>Worcester MA<br>01655                                                                                                                                                                                                      | Celia.Schiffer@u<br>massmed.edu     |
| <b>IVY ZHANG</b>               | Memorial Sloan<br>Kettering Cancer<br>Center                      | Memorial Sloan<br>Kettering Cancer<br>Center   | 1275 York Ave,<br>New York, NY<br>10065                                                                                                                                                                                                      | ivy.zhang@chode<br>ralab.org        |
| <b>IVÁN PULIDO</b>             | Memorial Sloan<br>Kettering Cancer<br>Center                      | Memorial Sloan<br>Kettering Cancer<br>Center   | 1275 York Ave,<br>New York, NY<br>10065                                                                                                                                                                                                      | ivan.pulido@chod<br>eralab.org      |
| <b>CHARLIE<br/>TOMLINSON</b>   | Diamond Light<br>Source Ltd;<br>Research<br>Complex at<br>Harwell | Life Sciences                                  | Diamond Light<br>Source, Harwell<br>Science and<br>Innovation<br>Campus, Didcot,<br>OX11 0DE, United<br>Kingdom;<br>Research<br>Complex at<br>Harwell, Harwell<br>Science and<br>Innovation<br>Campus, Didcot<br>OX11 0FA, United<br>Kingdom | charlie.tomlinson<br>@diamond.ac.uk |
| <b>JENNY C.<br/>TAYLOR</b>     | University of<br>Oxford                                           | Nuffield<br>Department of<br>Medicine          | Wellcome Centre<br>for Human<br>Genetics,<br>Roosevelt Drive,<br>Oxford OX3 7BN,<br>UK                                                                                                                                                       | jenny@well.ox.ac.<br>uk             |
| <b>TRISTAN IAN<br/>CROLL</b>   | Cambridge<br>Institute for<br>Medical<br>Research, The            | Haematology                                    | Keith Peters<br>Building, Hills Rd,<br>Cambridge CB2<br>0XY, UK                                                                                                                                                                              | tic20@cam.ac.uk                     |

|                             |                         |                         |                                                                                |                               |
|-----------------------------|-------------------------|-------------------------|--------------------------------------------------------------------------------|-------------------------------|
|                             | University of Cambridge |                         |                                                                                |                               |
| <b>LENNART<br/>BRWEWITZ</b> | University of Oxford    | Department of Chemistry | Chemistry Research Laboratory, 12 Mansfield Rd, Oxford OX1 3TA, United Kingdom | lennart.brewitz@chem.ox.ac.uk |
